# 1 Heterologous vaccination regimens with self-amplifying RNA and Adenoviral 2 COVID vaccines induce robust immune responses in mice

3

4

5 Alexandra J Spencer<sup>1\*</sup>, Paul F McKay<sup>2</sup>, Sandra Belij-Rammerstorfer<sup>1</sup>, Marta Ulaszewska<sup>1</sup>,  
6 Cameron D Bissett<sup>1</sup>, Kai Hu<sup>2</sup>, Karnyart Samnuan<sup>2</sup>, Anna K. Blakney<sup>2</sup>, Daniel Wright<sup>1</sup>, Hannah  
7 R Sharpe<sup>1</sup>, Ciaran Gilbride<sup>1</sup>, Adam Truby<sup>1</sup>, Elizabeth R Allen<sup>1</sup>, Sarah C Gilbert<sup>1</sup>, Robin J  
8 Shattock<sup>2</sup>, Teresa Lambe<sup>1</sup>

9

## 10 **Affiliations:**

11 <sup>1</sup>*The Jenner Institute, Nuffield Department of Medicine, University of Oxford,*  
12 *United Kingdom*

13 <sup>2</sup>*Department of Infectious Disease, Imperial College London, United Kingdom*

14

15 *\*Correspondence to: Alexandra J Spencer, The Jenner Institute, ORCRB, Roosevelt Drive,*  
16 *Oxford OX3 7DQ. Email: alex.spencer@ndm.ox.ac.uk.*

17

18

19 **Short title:** Immunogenicity of heterologous COVID vaccination regimens

20

## 21 **Abstract**

22 Several vaccines have demonstrated efficacy against SARS-CoV-2 mediated disease, yet  
23 there is limited data on the immune response induced by heterologous vaccination

24 regimens using alternate vaccine modalities. Here, we present a detailed description of the  
 25 immune response, in mice, following vaccination with a self-amplifying RNA (saRNA) vaccine  
 26 and an adenoviral vectored vaccine (ChAdOx1 nCoV-19/AZD1222) against SARS-CoV-2. We  
 27 demonstrate that antibody responses are higher in two dose heterologous vaccination  
 28 regimens than single dose regimens. Neutralising titres after heterologous prime-boost  
 29 were at least comparable or higher than the titres measured after homologous prime boost  
 30 vaccination with viral vectors. Importantly, the cellular immune response after a  
 31 heterologous regimen is dominated by cytotoxic T cells and Th1<sup>+</sup> CD4 T cells which is  
 32 superior to the response induced in homologous vaccination regimens in mice. These results  
 33 underpin the need for clinical trials to investigate the immunogenicity of heterologous  
 34 regimens with alternate vaccine technologies.

35

36

## 37 **Introduction**

38 A number of vaccines against SARS-CoV-2 have reached late-stage clinical trials with  
 39 encouraging efficacy readouts and mass vaccination schemes already initiated across  
 40 several countries. Multiple vaccine technologies are being advanced <sup>1</sup>, but there is limited  
 41 information on how these vaccine modalities may work in combination. With ongoing  
 42 clinical trial assessment of numerous SARS-CoV-2 vaccines and mass vaccination incentives,  
 43 there is a recognised real-world scenario where individuals may be vaccinated with different  
 44 vaccine modalities. However, the utility of vaccination regimens combining different types  
 45 of vaccine approaches remains to be determined.

46

Self-amplifying RNA (saRNA) typically encodes the alphaviral replicase and a target antigen. Upon entry into the cytoplasm, the RNA is amplified with subsequent translation of the target antigen<sup>2</sup>. The SARS-CoV-2 saRNA vaccine has been demonstrated to be highly immunogenic in preclinical animal models<sup>3</sup> and is progressing through clinical trial assessment with promising results. Adenoviruses are a frequently used viral vector vaccine technology, they can be rapidly made to GMP at large scale, and a single vaccination can be sufficient to provide rapid immunity in individuals<sup>4</sup>. In particular, chimpanzee derived adenoviruses (ChAd) have good safety profiles, whilst inducing strong cellular and humoral immune response against multiple target disease antigens<sup>5-7</sup>. Previous studies have demonstrated efficacy after vaccination with ChAdOx1 nCoV-19/AZD1222 against SARS-CoV-2 mediated disease<sup>8</sup>, with concomitant high titre humoral immune responses and a measurable Th1-dominated cellular immune response<sup>9,10</sup>. Importantly, an immune profile consistently observed across different animal species<sup>11,12</sup>.

60

In this study, the immunogenicity of saRNA and ChAdOx1 vaccines expressing full-length SARS-CoV-2 spike protein were assessed in mice following vaccination with different combinations of vaccine modalities. We demonstrate robust antibody responses following heterologous vaccination regimens, with high titre neutralising antibodies. The cellular immune response is dominated by cytotoxic T cells secreting IFN $\gamma$  and TNF $\alpha$  and antigen specific CD4+ T cells of a Th1 phenotype, with significantly higher antigen specific responses observed following heterologous vaccination than those responses induced in single vaccine regimens. These results underpin the need for clinical trial assessment of immunisation regimens with alternate vaccine modalities.

70

71

## 72 **Results**

### 73 **Heterologous vaccination potentiates SARS-CoV-2 spike-specific antibody response**

74 It was previously shown that homologous prime-boost immunization with saRNA<sup>3</sup> or ChAd  
 75 <sup>11</sup> induced a SARS-CoV-2 spike-specific IgG response with neutralisation capacity. In this  
 76 series of experiments, we compared the immune response induced by heterologous,  
 77 homologous and single dose vaccination with ChAd and saRNA vaccine modalities.  
 78 Heterologous vaccination with either ChAd or saRNA prime and alternative boost (i.e. ChAd-  
 79 saRNA or saRNA-ChAd) or two doses of saRNA induced the highest IgG responses, compared  
 80 to mice vaccinated with a single dose of either ChAd or saRNA (Fig. 1A and Fig. S1A), with  
 81 strong correlation between the two independent IgG ELISA methods (Fig. S1B). This IgG  
 82 response showed mixed profile, with mainly IgG2 (IgG2a, IgG2b in both mouse strains and  
 83 IgG2c in CD1 mice) and IgG1 subclasses (in both mouse strains) (Fig. 2A and B), which was  
 84 similar to previously reported results after vaccination with ChAd alone<sup>13</sup> or saRNA alone<sup>3</sup>.  
 85 Comparable amounts of SARS-CoV-2 spike-specific IgM were detected in all vaccinated  
 86 groups (Fig. 1B), while heterologous vaccination with saRNA-ChAd induced higher serum  
 87 SARS-CoV-2 spike-specific IgA levels compared to single vaccination with either vaccine, in  
 88 both CD1 and BALB/c mice (Fig. 1B).  
 89 Two doses of vaccine were also shown to increase the avidity of the IgG towards SARS-CoV-  
 90 2 spike (Fig. 1C) compared to single administration of either vaccine, while antibody-  
 91 mediated neutralisation was measured across all groups of vaccinated mice, with  
 92 heterologous and two dose saRNA inducing significantly higher levels of neutralisation  
 93 compared to single dose vaccination regimens (Fig. 1D). Not surprisingly, a correlation was

measured between neutralisation and levels of IgG /IgA SARS-CoV-2 spike-specific antibodies (Fig. S1C). Flow cytometry staining enabled identification of SARS-CoV-2 spike-specific B cells in the spleen of BALB/c mice. The data demonstrated that all vaccination regimens induced a similar number of antigen specific B cells (Fig. S2B), with similar numbers of germinal centre (GC) and isotype class switched B cells observed in all groups of vaccinated mice. Formation of GC is important for generation of long-lived memory B cells and the data demonstrates that changing vaccine modalities did not impact formation of GC B cells.

### **Heterologous vaccination induces strong Th1 type response**

T-cell mediated immunity was also investigated following heterologous or homologous ChAdOx1 and saRNA vaccination regimens. The highest IFN $\gamma$  response detected by ELISpot was observed in mice that received a heterologous combination of vaccines, this increase was only statistically significant when compared to single administration of saRNA in both strains of mice (Fig. 3A and B), or saRNA-ChAd compared to ChAd in BALB/c mice (Fig. 3B). In agreement with earlier reports, ELISpot responses were primarily directed towards the S1 portion of the spike protein (Fig S3A), with a consistent breadth of response measured with all vaccine combinations and in both strains of mice (Fig. 3A and B).

Phenotype and functional capacity of the T cell response was measured by intracellular cytokine staining, together with memory T cell marker staining. Consistent with previously published data, saRNA and ChAd vectors induced antigen specific CD4<sup>+</sup> T cells of a Th1 bias, with minimal IL4 and IL10 production measured and a response dominated by production of IFN $\gamma$  and TNF $\alpha$ , regardless of the vaccination regimen (Fig. 4A). Antigen specific CD4<sup>+</sup> T cells displayed mixed T effector (Teff) and T effector memory (Tem) phenotype, with no

118 statistically significant differences observed in the total number of cells (Fig. 4A) and cell  
 119 subsets (Fig. S3C). As before, in mice the cell-mediated response following vaccination was  
 120 dominated by CD8<sup>+</sup> T cells, with much higher levels of IFN $\gamma$  and TNF $\alpha$  (in addition to  
 121 upregulation of CD107a) seen in all vaccine groups (Fig. 4B) compared to CD4<sup>+</sup> T cell  
 122 responses. In addition, the highest number of antigen specific T cells, in both outbred and  
 123 inbred strains of mice, was measured following heterologous vaccination, regardless of  
 124 vaccine order (Fig. 4B) with antigen specific CD8<sup>+</sup> T cells displayed a predominantly Teff  
 125 phenotype.

126

127

## Discussion

The current pandemic and extraordinary efforts to develop effective vaccines with subsequent mass vaccination roll-out has highlighted the ‘real-world’ practicalities of global vaccination campaigns. There are approximately 20 vaccines in Phase 3 clinical trial assessment, and several vaccines have already reported efficacy with subsequent emergency licensure granted in some countries. While each individual vaccine candidate has been thoroughly tested for safety and efficacy, there have been no studies reported to date that have examined the safety, efficacy or any added benefit of mixed modality vaccinations. Given the real-world vaccination initiatives that are being progressed, there are scenarios wherein an individual receives a vaccine prime and a boost dose from different manufacturers or of different vaccine types. This current pre-clinical study examined the cellular and humoral immune responses in mice following vaccination with either the ChAdOx adenoviral vector or the saRNA LNP in homologous or heterologous prime-boost combinations and strongly supports the need for clinical trial assessment of heterologous prime-boost regimens.

All prime-boost regimens elicited high levels of SARS-CoV-2 spike-specific antibodies with neutralisation capacity and high avidity, levels that were greater than single vaccines alone. Heterologous vaccination regimens induced some of the highest antibody responses post-vaccination, with neutralising titres after heterologous prime-boost at least comparable to or higher than those achieved after homologous vaccination with ChAdOx1 nCoV-19. While homologous saRNA and ChAd induced higher antibody responses than single dose regimens, which is consistent with previous data in mice, pigs and NHPs<sup>11,12</sup>. We have demonstrated in NHPs, that homologous vaccination with ChAdOx1 nCoV-19 results in protection against

disease, with more recent data, in hamsters, demonstrating that a single immunisation with ChAdOx1 nCoV-19 protects against disease induced by the variants of concern B.1.351 and B.1.1.7 (van Doremalen et al submitted). Importantly in human clinical trials, strong enhancement of the antibody response was observed following a booster dose of ChAdOx1<sup>14</sup>, with this regimen shown to be efficacious against SARS-CoV-2 disease in late-stage clinical trials<sup>8</sup>. While recent real world data, in elderly frail people, has demonstrated vaccine effectiveness after the first dose of ChAdOx1nCoV-19 at 80.4% (95% CI 36.4-94.5) with broadly similar effectiveness measured after RNA (Pfizer) vaccination (Hymas et al, Lancet preprint).

While there are no defined correlates of protection from clinical trials, Rhesus Macaques studies have demonstrated a clear role for neutralising antibodies and also CD8<sup>+</sup> T cells in protecting against disease<sup>15</sup>. In agreement, human studies have demonstrated neutralising antibodies and T cells play an important role in preventing severe disease and augmenting recovery from COVID-19<sup>16</sup>. Both vaccine modalities also elicited high numbers of antigen specific T cells, which were further increased in the heterologous regimens. The majority of the IFN $\gamma$  ELISpot response was directed against the S1 spike protein, particularly the first half (317 AA) which does not include the RBD. The cell-mediated response was dominated by cytotoxic T cells, with heterologous regimens inducing higher frequencies and total numbers of antigen specific CD8<sup>+</sup> T cells. Although CD4<sup>+</sup> T cell responses were overall lower in frequency and number than CD8<sup>+</sup> T cell responses, all vaccination regimens elicited CD4<sup>+</sup> T cell responses of a Th1 type response, even in the Th2 biased BALB/c background, a response indicating that the potential for antibody dependent enhancement (ADE) and



subsequent enhancement of respiratory disease (ERD) caused by Th2-type lung

immunopathology is reduced <sup>17-19</sup>.

Vaccination regimens that induce a broad immune response (humoral and cell-mediated) will likely be the best option for long-term protection against COVID-19. It remains to be determined if the higher antibody titres following heterologous vaccination regimens, as measured here, results in longer lived immunity with a broader humoral response. Critically, the logistical challenges of administering vaccines in a rapidly evolving landscape of mass vaccination schemes, coupled with limited global supply, underpins the need to generate data on mixing vaccine modalities. It will be important to clinically assess if the mixed modality regimens have an altered or lessened reactogenicity profile, and most importantly the ability to augment protection against disease or onward transmission. Importantly some of these questions will be addressed in a recent clinical study recruiting up to 820 participants to receive combinations of two different SARS CoV-2 vaccines which has been initiated in the UK (<https://comcovstudy.org.uk/home>). The data described herein reinforces the need for this and other clinical trials to assess the safety, immunogenicity and efficacy of heterologous vaccination regimens.

## Methods

**Ethics Statement;** Mice were used in accordance with the UK Animals (Scientific Procedures) Act under project license number P9804B4F1 granted by the UK Home Office. Age matched animals were purchased from commercial suppliers as a batch for each experiment and randomly split into groups on arrival at our facility. Animals were group housed in IVCs under SPF conditions, with constant temperature and humidity with lighting on a 13:11 light-dark cycle (7am to 8pm). For induction of short-term anaesthesia, animals were anaesthetised using vaporised IsoFlo<sup>®</sup>. All animals were humanely sacrificed at the end of each experiment by an approved Schedule 1 method.

**Animals and Immunizations;** Outbred CD1Hsd:ICR (CD-1) (Envigo) (n=8 per group), Crl:CD1 (ICR) (Charles River) (n=8 per group) and inbred BALB/cOlaHsd (BALB/c) (Envigo) (n=6 per group) mice of 7 weeks of age, were immunized intramuscularly (i.m.) in the musculus tibialis with 10<sup>8</sup> infectious units (iu) of ChAdOx1 nCoV-19<sup>12</sup>, 1µg saRNA<sup>3</sup> or received no prime vaccination. Mice were boosted (or primed for mice receiving only a single vaccination) i.m. with the relevant vaccine candidate 4 weeks later. All mice were sacrificed 3 weeks after the final vaccination with serum and spleens collected for analysis of humoral and cell-mediated immunity.

**Pseudotype virus neutralisation assay;** A HIV-pseudotyped luciferase-reporter based system was used to assess the neutralization ability of sera from vaccinated mice. In brief, CoV S-pseudotyped viruses were produced by co- transfection of 293T/17 cells with a HIV-1 gag-pol plasmid (pCMV-Δ8.91, a kind gift from Prof. Julian Ma, St George's University of London), a firefly luciferase reporter plasmid (pCSFLW, a kind gift from Prof. Julian Ma, St

George's University of London) and a plasmid encoding the S protein of interest (pSARS-CoV2-S) at a ratio of 1:1.5:1. Virus-containing medium was clarified by centrifugation and filtered through a 0.45 µm membrane 72 h after transfection, and subsequently aliquoted and stored at -80 °C. For the neutralization assay, heat-inactivated sera were first serially diluted and incubated with virus for 1 h, and then the serum-virus mixture was transferred into wells pre-seeded Caco2 cells. After 48 h, cells were lysed, and luciferase activity was measured using Bright-Glo Luciferase Assay System (Promega). The IC50 neutralization was then calculated using GraphPad Prism (version 8.4). Statistical analyses were performed on log transformed data.

**Antigen-specific IgG ELISA;** The antigen-specific IgG titres in mouse sera were assessed by a semi-quantative ELISA. MaxiSorp high binding ELISA plates (Nunc) were coated with 100 µL per well of 1 µg mL<sup>-1</sup> recombinant SARS-CoV-2 protein with the pre-fusion stabilized conformation in PBS. After overnight incubation at 4 °C, the plates were washed 4 times with PBS-Tween 20 0.05% (v/v) and blocked for 1 h at 37 °C with 200 µL per well blocking buffer (1% BSA (w/v) in PBS-Tween-20 0.05%(v/ v)). The plates were then washed and the diluted samples or a 5-fold dilution series of the standard IgG added using 50 µL per well volume. Plates were incubated for 1 h at 37 °C, then washed and secondary antibody added at 1:2000 dilution in blocking buffer (100 µL per well) and incubated for 1 hr at 37 °C. After incubation and washes, plates were developed using 50 µL per well SureBlue TMB (3,3',5,5'-tetramethylbenzidine) substrate and the reaction stopped after 5 min with 50 µL per well stop solution (Insight Biotechnologies). The absorbance was read on a Versamax Spectrophotometer at 450 nm (BioTek Industries). Statistical analyses were performed on log-transformed data.

245

246 **Antigen specific Isotype ELISA;** MaxiSorp plates (Nunc) were coated with 50 µl of 2 µg/mL  
 247 or 50ul of 5 µg/mL ng/well SARS-CoV-2 full-length spike (FL-S) protein overnight at 4 °C for  
 248 detection of IgG (250ng/well) or IgM and IgA (500ng/well), respectively, prior to washing in  
 249 PBS/Tween (0.05% v/v) and blocking with Blocker Casein in PBS (Thermo Fisher Scientific)  
 250 for 1 h at room temperature (RT). Standard positive serum (pool of mouse serum with high  
 251 endpoint titre against FL-S protein), individual mouse serum samples, negative and an  
 252 internal control (diluted in casein) were incubated for 2 hrs at room temperature for  
 253 detection of specific IgG or 1h at 37 °C for detection of specific IgM or IgA. Following  
 254 washing, bound antibodies were detected by addition of alkaline phosphatase (AP)-  
 255 conjugated goat anti-mouse IgG (Sigma-Aldrich) or anti-mouse IgM (Abcam) or anti-mouse  
 256 IgA (SouthernBiotech) for 1h at room temperature and addition of p-Nitrophenyl  
 257 Phosphate, Disodium Salt substrate (Sigma-Aldrich). An arbitrary number of ELISA units (EU)  
 258 were assigned to the reference pool and optical density values of each dilution were fitted  
 259 to a 4-parameter logistic curve using SOFTmax PRO software. ELISA units were calculated for  
 260 each sample using the optical density values of the sample and the parameters of the  
 261 standard curve. IgM limit of detection was defined a 2 ELISA Units, IgA limit of detection set  
 262 as 6 ELISA Units. All data was log-transformed for statistical analyses.

263

264 **Antigen Specific IgG Subclass ELISAs;** MaxiSorp plates (Nunc) were coated with 50 µL of 2  
 265 µg/mL per well of SARS-CoV-2 FL-S protein overnight at 4 °C prior to washing in PBS/Tween  
 266 (0.05% v/v) and blocking with Blocker Casein in PBS (Thermo Fisher Scientific) for 1 h at  
 267 room temperature (RT). For detection of IgG subclasses all serum samples were diluted to 1  
 268 total IgG EU and incubated at 37 °C for 1 h prior to detection with Alkaline Phosphatase

conjugated anti-mouse IgG subclass-specific secondary antibodies (Southern Biotech or Abcam) incubated for 1 h at 37 °C. The results of the IgG subclass ELISA are presented using optical density values.

**Avidity ELISA;** Anti-SARS-CoV-2 spike-specific total IgG antibody avidity was assessed by sodium thiocyanate (NaSCN)-displacement ELISA. Nunc MaxiSorp ELISA plates (Thermo Fisher Scientific) coated overnight at 4°C with 2µg/well SARS-CoV-2 FL-S protein diluted in PBS were washed with PBS/Tween (0.05% v/v) and blocked for 1h with 100µl per well of Blocker Casein in PBS (Thermo Fisher Scientific) at 20°C. Test samples and a positive control serum pool were diluted in blocking buffer to 1 total IgG EU and incubated for 2h at 20°C. After washing, increasing concentrations of NaSCN (Sigma-Aldrich) diluted in PBS were added and incubated for 15min at 20°C. Following another wash, bound antibodies were detected by addition of AP-conjugated goat anti-mouse IgG (Sigma-Aldrich) for 1 h at room temperature and addition of p-Nitrophenyl Phosphate, Disodium Salt substrate (Sigma-Aldrich). For each sample, concentration of NaSCN required to reduce the OD405 to 50% of that without NaSCN (IC50) was interpolated from this function and reported as a measure of avidity.

**Antigen specific B cell staining;** Spike, RBD and a decoy NANP<sub>9</sub>C (repeat region from *P. falciparum* CSP protein) tetramers were prepared in house by mixing biotinylated proteins with streptavidin conjugated flurochromes (A488, A647 or r-PE) in a 4:1 molar ratio and incubating on ice for 30 minutes. Splenocytes were stained with Spike-PE and RBD-A647 at a final concentration of 0.04mM, whilst decoy tetramer, NANP<sub>9</sub>C-A488 was used at a final concentration of 0.4mM. Splenocytes were stained with Live-Dead Aqua and Fc block (anti-

CD16/32 mAb, Clone 93) prior to staining with the antibody cocktail containing NANP<sub>9</sub>C-Alexa488, GL7-PerCPy5.5 (Clone GL7), CD138 BV421 (Clone 281-2), CD95-BV605 (Clone SA367H8), CD4-BV650 (Clone GK1.5), CD279-BV711 (Clone 29F.1A12), CD19-BV780 (6D5), RBD-A647, IgD-A700 (Clone 11-26c.2a), IgM-APCCy7 (Clone 11/41), Spike-PE, CD38-PECy5 (Clone 90), CD69 PeCy7 (Clone H1.2F3), CD45R-BUV395 (Clone RA3-6B2) and CD3-BUV496 (Clone 145-2C11), antibodies purchased from BioLegend, BD or Invitrogen. Antigen specific B cells were identified by gating on LIVE/DEAD negative, size (FSC-A vs SSC), doublet negative (FSC-H vs FSC-A), CD45RA<sup>+</sup>, CD19<sup>+</sup> and NANP-A488<sup>-</sup>, RBD-A647<sup>+</sup> and Spike-PE<sup>+</sup> followed by staining for germinal centre or class switched B cells (Figure S2A). The total number of cells was calculated by multiplying the frequency of each population, expressed as a percentage of total lymphocytes, by the total number of lymphocytes counted for each individual mouse spleen sample.

**ELISpot and ICS staining;** Spleen single cell suspension were prepared by passing cells through 70µM cell strainers and ACK lysis prior to resuspension in complete media. Splenocytes were stimulated 15mer peptides (overlapping by 11) spanning the length of SARS CoV2 protein, with peptide pools subdivided into peptides spanning the S1 and S2 region of spike (Table S1). For analysis of IFNγ production by ELISpot, splenocytes were stimulated with two pools of S1 peptides (pools 1 and 2) and two pools of S2 peptides (pools 3 and 4) (final concentration of 2µg/mL) on IPVH-membrane plates (Millipore) coated with 5µg/mL anti-mouse IFNγ (AN18). After 18-20 hours of stimulation at 37 °C, IFNγ spot forming cells (SFC) were detected by staining membranes with anti-mouse IFNγ biotin (1mg/mL) (R46A2) followed by streptavidin-Alkaline Phosphatase (1mg/mL) and development with AP conjugate substrate kit (BioRad, UK).

For analysis of intracellular cytokine production, cells were stimulated at 37 °C for 6 hours with 2µg/mL a pool of S1 (ELISpot pools 1 and 2) or S2 (ELISpot pools 3 and 4) peptides (Table S1), media or positive control cell stimulation cocktail (containing PMA-Ionomycin, BioLegend), together with 1µg/mL Golgi-plug (BD) and 2µl/mL CD107a-Alexa647 (Clone 1D4B). Following surface staining with CD3-A700 (Clone 17A2), CD4-BUV496 (Clone GK1.5), CD8-BUV496 (Clone 53-6.7), CD44-BV780 (Clone IM7), CD62L-BV711 (Clone MEL-14), CD69-PECy7 (Clone H1.2F3) and CD127-BV650 (Clone A7R34) or CD127-APCCy7 (Clone A7R34), cells were fixed with 4% paraformaldehyde and stained intracellularly with TNFα-A488 (Clone MP6-XT22), IL2-PerCPCy5.5 (Clone JES6-5H4), IL4-BV605 (Clone 11B11), IL10-PE (Clone JES5-16E3) and IFNγ-e450 (Clone XMG1.2) diluted in Perm-Wash buffer (BD). Sample acquisition was performed on a Fortessa (BD) and data analyzed in FlowJo V10 (TreeStar). An acquisition threshold was set at a minimum of 5000 events in the live CD3<sup>+</sup> gate. Antigen specific T cells were identified by gating on LIVE/DEAD negative, doublet negative (FSC-H vs FSC-A), size (FSC-A vs SSC), CD3<sup>+</sup>, CD4<sup>+</sup> or CD8<sup>+</sup> cells and each individual cytokine or “cytokine positive” comprised of a combination of “CD107a or IFNγ or TNFα or IL2 or IL4 or IL10) populations. Cytokine positive responses are presented after subtraction of the background response detected in the corresponding media stimulated control sample for each mouse and summing together the response detected to each pool of peptides. T effector (Teff) cells were defined as CD62L<sup>low</sup> CD127<sup>low</sup>, T effector memory (Tem) cells defined as CD62L<sup>low</sup> CD127<sup>hi</sup> and T central memory (Tcm) cells defined as CD62L<sup>hi</sup> CD127<sup>hi</sup> (Figure S3B). The total number of cells was calculated by frequency of the background corrected population (expressed as a percentage of total lymphocytes) by the total number of lymphocytes counted in each individual spleen sample.

**Statistical analysis;** All graphs and statistical analysis were performed using Prism v9 (Graphpad). For analysis of vaccination regimen against a single variable (eg IgG level), data was analysed with a one-way anova (Kruskal-Wallis) followed by post-hoc positive test. For analysis of vaccination regimen against multiple variables (eg each individual cytokine or T cell subset) the data was analysed with a two-way analysis of variance, where a significant difference was observed, a post-hoc analysis was performed to compare the overall effect of vaccination regimen. In graphs where a significant difference was observed between multiple vaccine groups, the highest p value is displayed on the graph. All data displayed on a logarithmic scale was log<sub>10</sub> transformed prior to statistical analysis (ELISA Units, Neutralisation Titres, Total Cell Numbers).

## References

- 1 Tregoning, J. S. *et al.* Vaccines for COVID-19. *Clin Exp Immunol* **202**, 162-192, doi:10.1111/cei.13517 (2020).
- 2 Blakney, A. K. *et al.* Big Is Beautiful: Enhanced saRNA Delivery and Immunogenicity by a Higher Molecular Weight, Bio-reducible, Cationic Polymer. *ACS Nano* **14**, 5711-5727, doi:10.1021/acsnano.0c00326 (2020).
- 3 McKay, P. F. *et al.* Self-amplifying RNA SARS-CoV-2 lipid nanoparticle vaccine candidate induces high neutralizing antibody titers in mice. *Nature communications* **11**, 3523, doi:10.1038/s41467-020-17409-9 (2020).
- 4 Ewer, K. *et al.* Chimpanzee adenoviral vectors as vaccines for outbreak pathogens. *Hum Vaccin Immunother* **13**, 3020-3032, doi:10.1080/21645515.2017.1383575 (2017).
- 5 Antrobus, R. D. *et al.* Clinical assessment of a novel recombinant simian adenovirus ChAdOx1 as a vectored vaccine expressing conserved Influenza A antigens. *Mol Ther* **22**, 668-674, doi:10.1038/mt.2013.284 (2014).
- 6 Venkatraman, N. *et al.* Safety and Immunogenicity of a Heterologous Prime-Boost Ebola Virus Vaccine Regimen in Healthy Adults in the United Kingdom and Senegal. *J Infect Dis* **219**, 1187-1197, doi:10.1093/infdis/jiy639 (2019).
- 7 Folegatti, P. M. *et al.* Safety and immunogenicity of a candidate Middle East respiratory syndrome coronavirus viral-vectored vaccine: a dose-escalation, open-label, non-randomised, uncontrolled, phase 1 trial. *Lancet Infect Dis* **20**, 816-826, doi:10.1016/S1473-3099(20)30160-2 (2020).
- 8 Voysey, M. *et al.* Safety and efficacy of the ChAdOx1 nCoV-19 vaccine (AZD1222) against SARS-CoV-2: an interim analysis of four randomised controlled trials in Brazil,



- 376 South Africa, and the UK. *Lancet* **397**, 99-111, doi:10.1016/S0140-6736(20)32661-1  
377 (2021).
- 378 9 Ewer, K. J. *et al.* T cell and antibody responses induced by a single dose of ChAdOx1  
379 nCoV-19 (AZD1222) vaccine in a phase 1/2 clinical trial. *Nat Med*,  
380 doi:10.1038/s41591-020-01194-5 (2020).
- 381 10 Barrett, J. R. *et al.* Phase 1/2 trial of SARS-CoV-2 vaccine ChAdOx1 nCoV-19 with a  
382 booster dose induces multifunctional antibody responses. *Nat Med*,  
383 doi:10.1038/s41591-020-01179-4 (2020).
- 384 11 Graham, S. P. *et al.* Evaluation of the immunogenicity of prime-boost vaccination  
385 with the replication-deficient viral vectored COVID-19 vaccine candidate ChAdOx1  
386 nCoV-19. *NPJ Vaccines* **5**, 69, doi:10.1038/s41541-020-00221-3 (2020).
- 387 12 van Doremalen, N. *et al.* ChAdOx1 nCoV-19 vaccine prevents SARS-CoV-2 pneumonia  
388 in rhesus macaques. *Nature* **586**, 578-582, doi:10.1038/s41586-020-2608-y (2020).
- 389 13 Silva-Cayetano, A. *et al.* A Booster Dose Enhances Immunogenicity of the COVID-19  
390 Vaccine Candidate ChAdOx1 nCoV-19 in Aged Mice. *Med (N Y)*,  
391 doi:10.1016/j.medj.2020.12.006 (2020).
- 392 14 Ramasamy, M. N. *et al.* Safety and immunogenicity of ChAdOx1 nCoV-19 vaccine  
393 administered in a prime-boost regimen in young and old adults (COV002): a single-  
394 blind, randomised, controlled, phase 2/3 trial. *Lancet* **396**, 1979-1993,  
395 doi:10.1016/S0140-6736(20)32466-1 (2021).
- 396 15 Mercado, N. B. *et al.* Single-shot Ad26 vaccine protects against SARS-CoV-2 in rhesus  
397 macaques. *Nature* **586**, 583-588, doi:10.1038/s41586-020-2607-z (2020).
- 398 16 Rydyznski Moderbacher, C. *et al.* Antigen-Specific Adaptive Immunity to SARS-CoV-2  
399 in Acute COVID-19 and Associations with Age and Disease Severity. *Cell* **183**, 996-  
400 1012 e1019, doi:10.1016/j.cell.2020.09.038 (2020).
- 401 17 Wang, S. F. *et al.* Antibody-dependent SARS coronavirus infection is mediated by  
402 antibodies against spike proteins. *Biochem Biophys Res Commun* **451**, 208-214,  
403 doi:10.1016/j.bbrc.2014.07.090 (2014).
- 404 18 Tseng, C. T. *et al.* Immunization with SARS coronavirus vaccines leads to pulmonary  
405 immunopathology on challenge with the SARS virus. *PLoS One* **7**, e35421,  
406 doi:10.1371/journal.pone.0035421 (2012).
- 407 19 Lee, W. S., Wheatley, A. K., Kent, S. J. & DeKosky, B. J. Antibody-dependent  
408 enhancement and SARS-CoV-2 vaccines and therapies. *Nat Microbiol* **5**, 1185-1191,  
409 doi:10.1038/s41564-020-00789-5 (2020).

411 **Acknowledgments:** The authors would like to thank D. Pulido for provision of spike and RBD  
412 proteins, BMS staff for animal husbandry and management and A. Worth, J.Furze, M.  
413 Mykhaylyk and R. Evans for facilities support.

414  
415 **Funding:** This report is independent research funded by the National Institute for Health  
416 Research (UKRI Grant Ref: MC\_PC\_19055, NIHR Ref: COV19 OxfordVacc-01). The views

expressed in this publication are those of the author(s) and not necessarily those of the National Institute for Health Research or the Department of Health and Social Care.

**Author Contributions:** AJS, MU, SB-J, CB, KS, KM & PMK performed experiments. AJS, MU, HS, CG, EA & AT performed animal procedures and/or sample processing. AJS, SBJ, KH & PMK, analyzed data. AJS, TL, PMK, RS & SG designed the study. AJS, SBJ, TB wrote the manuscript. All authors reviewed the final version of the manuscript.

**Competing interests:** SCG is co-founder and board member of Vaccitech (collaborators in the early development of this vaccine candidate) and named as an inventor on a patent covering use of ChAdOx1-vectored vaccines and a patent application covering this SARS-CoV-2 vaccine. TL is named as an inventor on a patent application covering this SARS-CoV-2 vaccine and was consultant to Vaccitech. PMK and RJS are co-founders and RJS is a board member of VaxEquity and VacEquity and are named inventors on a patent application covering the SARS-CoV-2 saRNA vaccine candidate.

## Figure legends

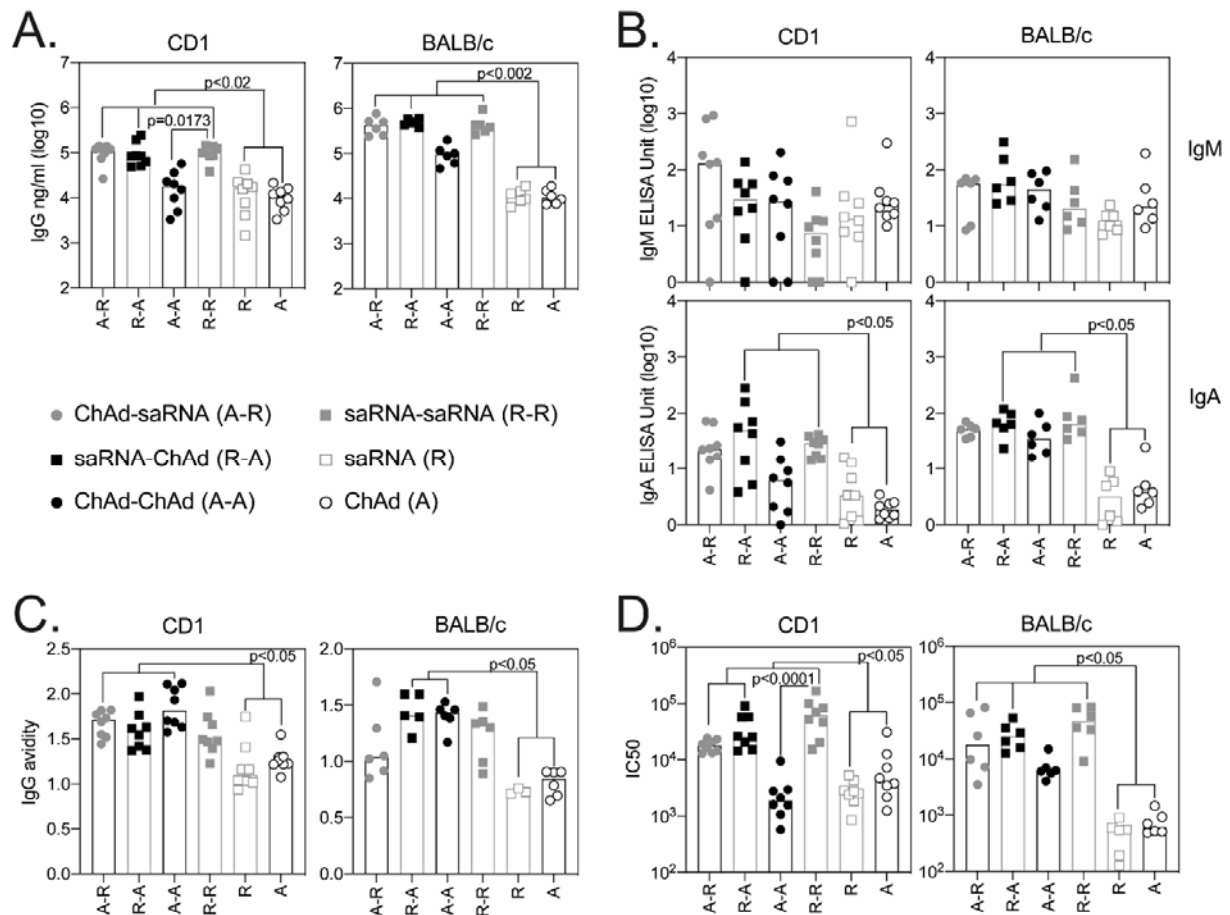

**Fig 1: Antibody responses following ChAd and saRNA vaccination**

Antibody responses were measured in the serum of CD1 (n=8) and BALB/c (n=6) mice collected 3 weeks after the final immunisation. Graphs show SARS CoV-2 spike-specific IgG (A.), IgM and IgA (B.) and IgG avidity (C.) measured by ELISA, and SARS-CoV-2 pseudotyped virus neutralisation (IC50) (D.). Individual mice are represented by a single data point, bars represent the median response in each group (CD1 n=8; BALB/c n=6). Data in each graph was analysed with a Kruskal-Wallis and post-hoc positive test to compare differences between vaccination groups, p values indicate significant differences between groups.

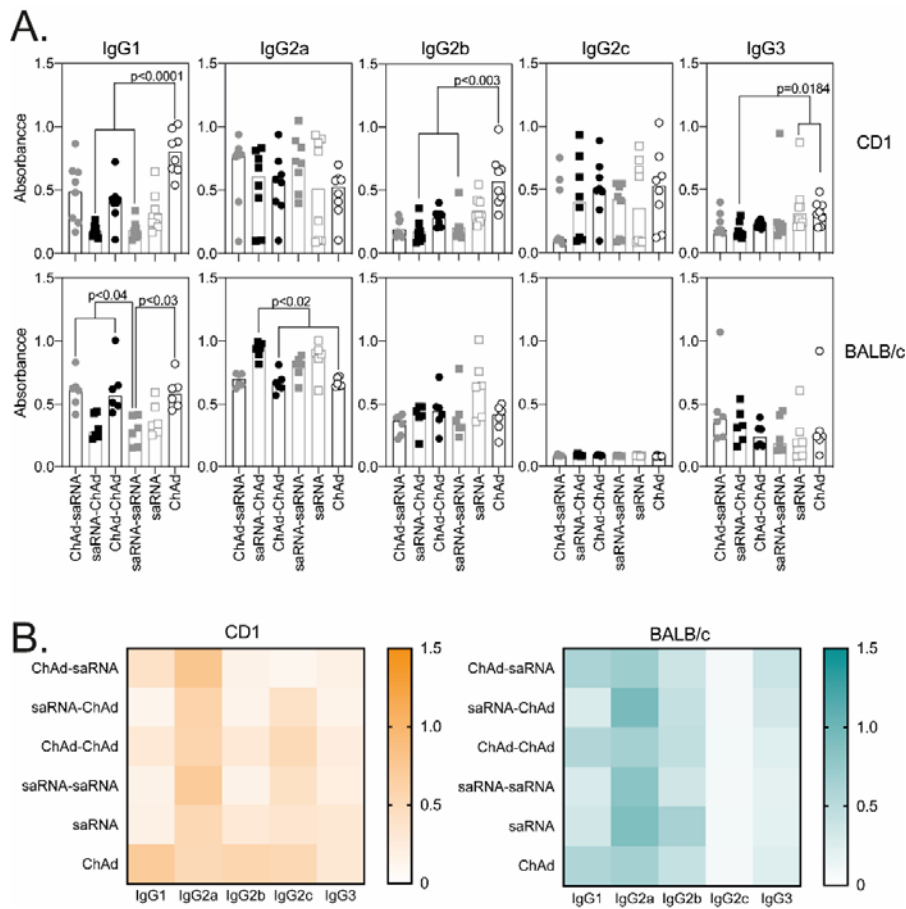

**Fig 2: SARS-CoV-2 spike-specific IgG subclasses following ChAd and saRNA vaccination**

For detection of IgG subclasses, each sample was diluted to 1 IgG ELISA Unit. Graphs show optical density measured against each IgG subclass where individual data points were expressed as an OD and shown here as scatter dot plots with bars showing the median (A.), followed by the heatmap summary representation with median response in each group to each IgG subclass (B.). Individual mice are represented by a single data point, bars represent the median response in each group (CD1 n=8; BALB/c n=6) with serum collected 3 weeks after the final vaccination. Data in each graph was analysed with a Kruskal-Wallis and post-hoc positive test to compare differences between vaccination groups, p-values indicate significant differences between groups.

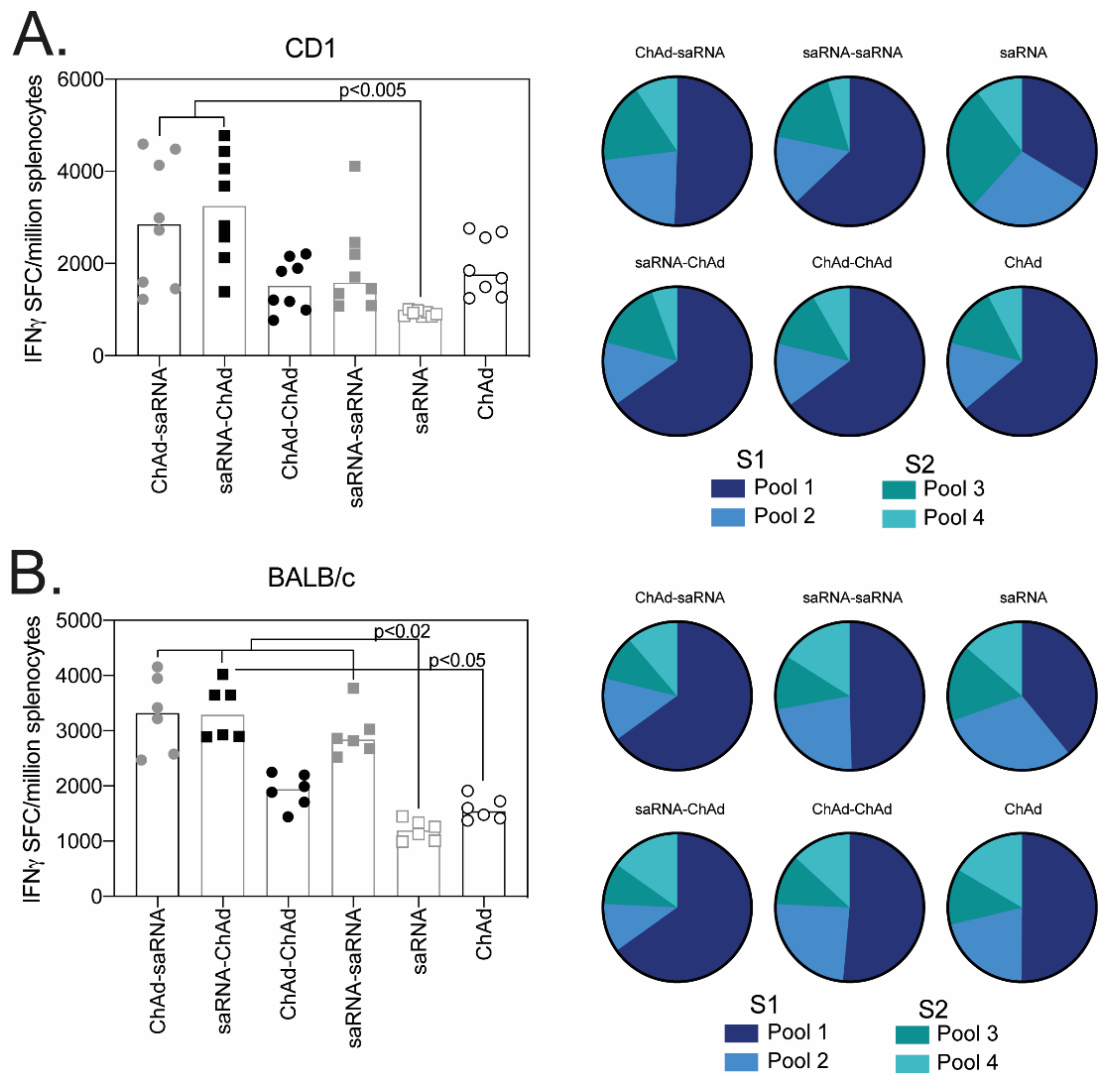

**Fig 3: Breadth of T cell response measured by ELISpot**

Graphs represent the total spike specific IFN $\gamma$  response (sum of peptide pools) measured in outbred CD1 (n=8) (**A.**) or inbred BALB/c (n=6) (**B.**) 3 weeks after the final vaccination. Pie charts represent the response to each peptide pool as a proportion of total response. Data points represent individual mice and bars represent the median response in each group. Data in each graph was analysed with a Friedman test and post-hoc Dunn's multiple comparison to compare between vaccination regimens, p values are indicated on the graph.

467

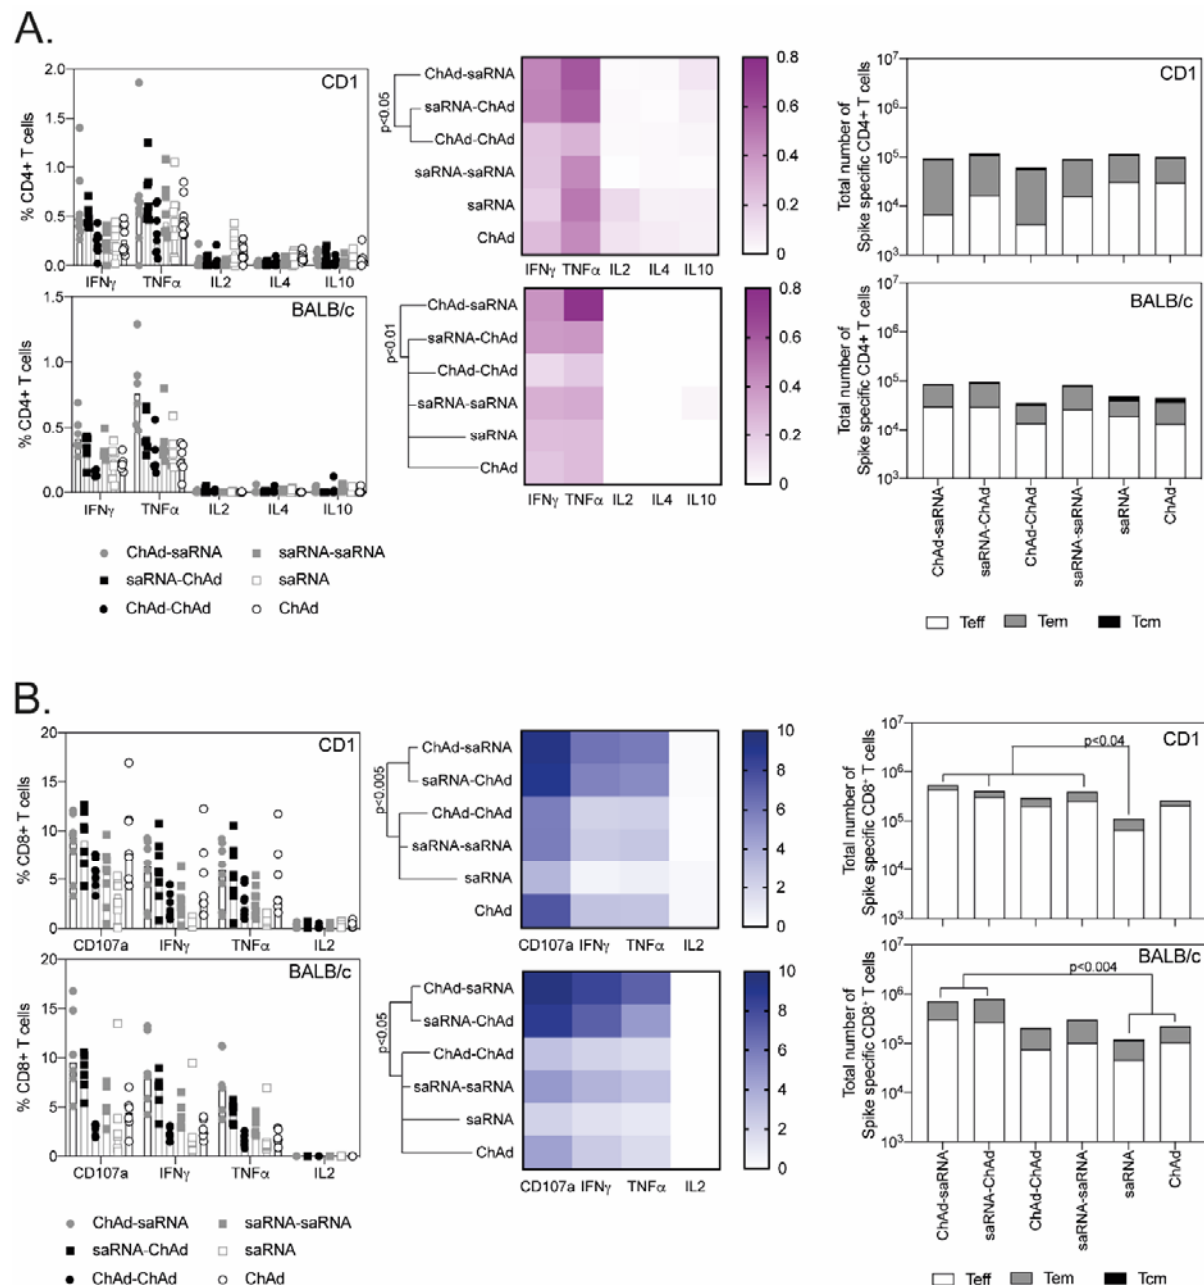

468

469 **Fig 4: Phenotype of the T cells response following vaccination**

470 CD1 (n=8) and BALB/c (n=6) splenocytes harvested 3 weeks after the final vaccination, were  
 471 stimulated for 6 hours with pools of overlapping SARS-CoV-2 peptides prior to staining for  
 472 effector and memory T cells markers and intracellular cytokines. **A.)** Graphs show the  
 473 frequency of the spike-specific CD4<sup>+</sup> T cells responses (left) in CD1 (top panel) and BALB/c

474 mice (bottom panel), heatmaps (middle) show the proportion of the response producing  
 475 each cytokine and total number of antigen specific cells of a T effector (Teff), T effector  
 476 memory (Tem) or T central memory (Tcm) phenotype (right). **B.)** Graphs show the  
 477 frequency of the spike-specific CD8<sup>+</sup> T cells responses (left) in CD1 (top panel) and BALB/c  
 478 mice (bottom panel), heatmaps (middle) show the proportion of the response producing  
 479 each cytokine and total number of antigen specific cells of a T effector (Teff), T effector  
 480 memory (Tem) or T central memory (Tcm) phenotype (right). Data points indicate individual  
 481 mice, bars represent the median response in each group. Total numbers of each population  
 482 are displayed in Fig S3C. Data in each graph was analysed with a two-way anova comparing  
 483 the effect of vaccination regimen and cytokine production or T cell phenotype, followed by  
 484 a post-hoc Tukey's multiple comparison test to compare between vaccination regimens, p  
 485 values showing overall differences between vaccination groups are indicated on the graph.  
 486  
 487  
 488

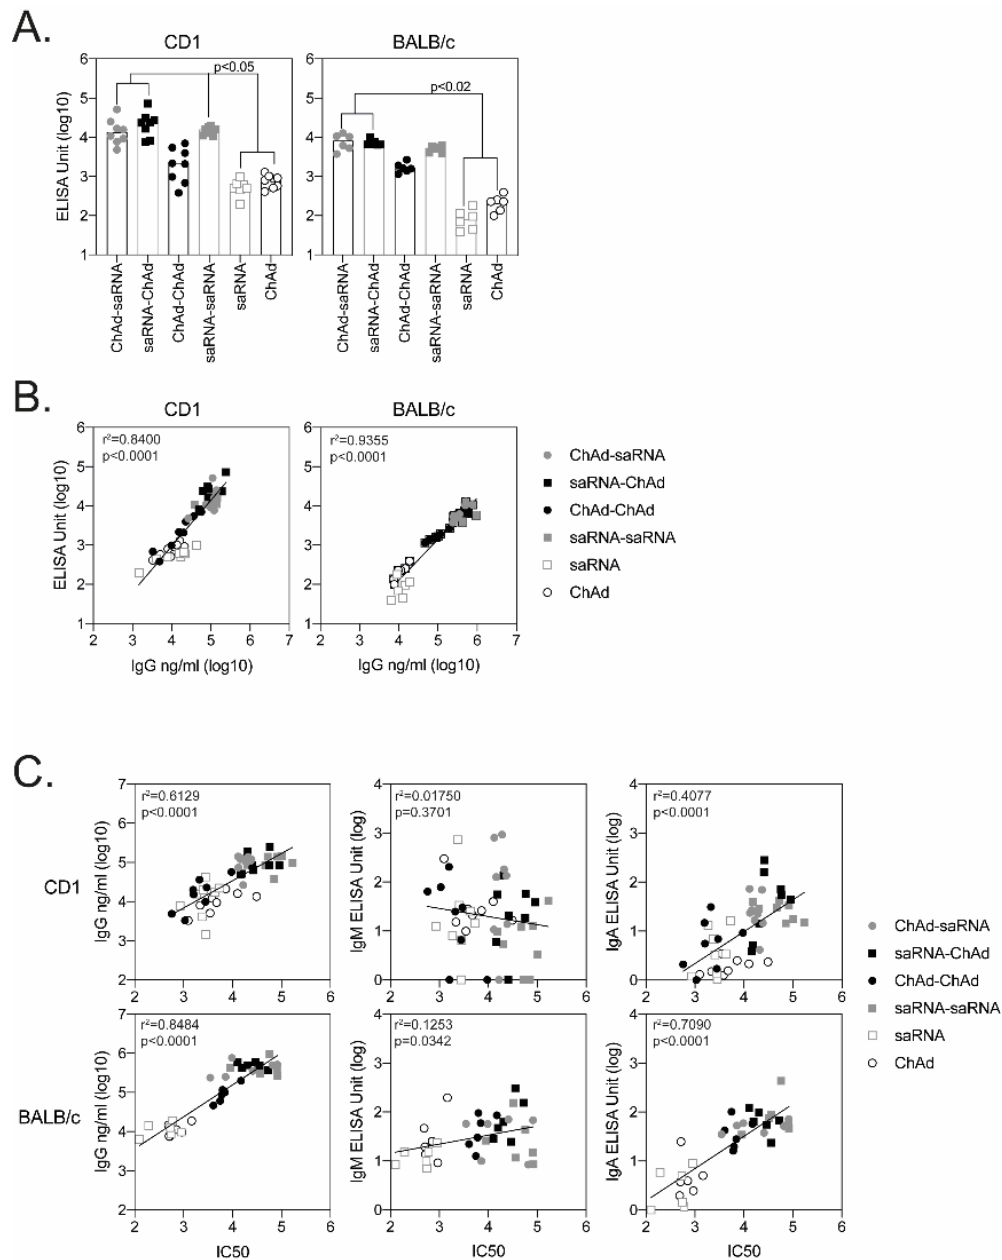

**Fig S1: Comparison of assays measuring antibody responses after vaccination**

SARS-CoV-2 spike-specific IgG responses were measured in a standardised ELISA (A.) and compared to IgG responses measured as a concentration (B.)

C.) Graphs show relationship between IgG, IgM and IgA responses to SARS-CoV-2 pseudoneutralisation IC50 values presented by linear



496 regression on log-transformed values. Data points represent individual animals from all

497 groups together,  $r^2$  and p values are indicated on each graph.

498

499

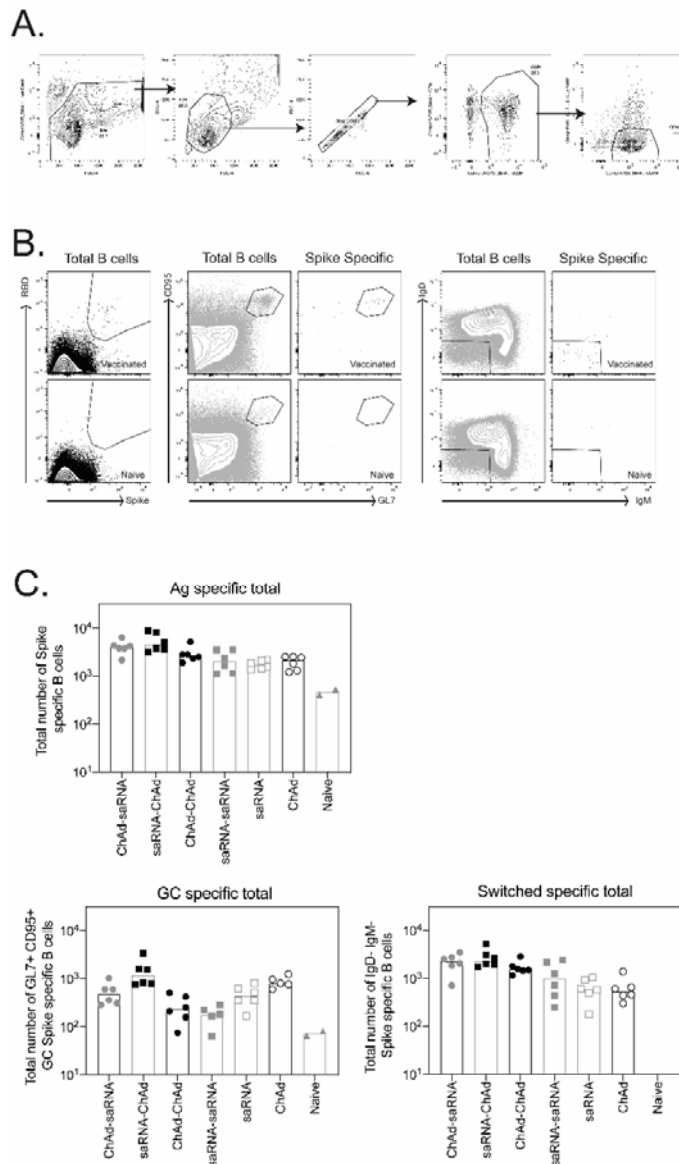

**Fig S2: Antigen specific B cell responses**

SARS-CoV-2 spike-specific B cells responses were measured in the spleen of BALB/c mice 3

weeks after the final immunisation. **A.)** Plots show the gating strategy for identification of B

cells. **B.)** antigen specific cells were identified by positive binding to spike-PE and RBD-A647

tetramers with an antigen specific population visible in vaccinated animals (top plot) but not

naïve mice (lower panel). Germinal center (GC) B cells were identified as GL7<sup>+</sup> and CD95<sup>+</sup>,

switched B cells identified as IgD<sup>-</sup> and IgM<sup>+</sup> antigen-specific B cells. **C.)** Graphs show the total

number of antigen-specific B cells, antigen-specific GC B cells and antigen-specific switched

509 B cells, data points are representative of individual mice, median responses per group

510 indicated by bars.

511

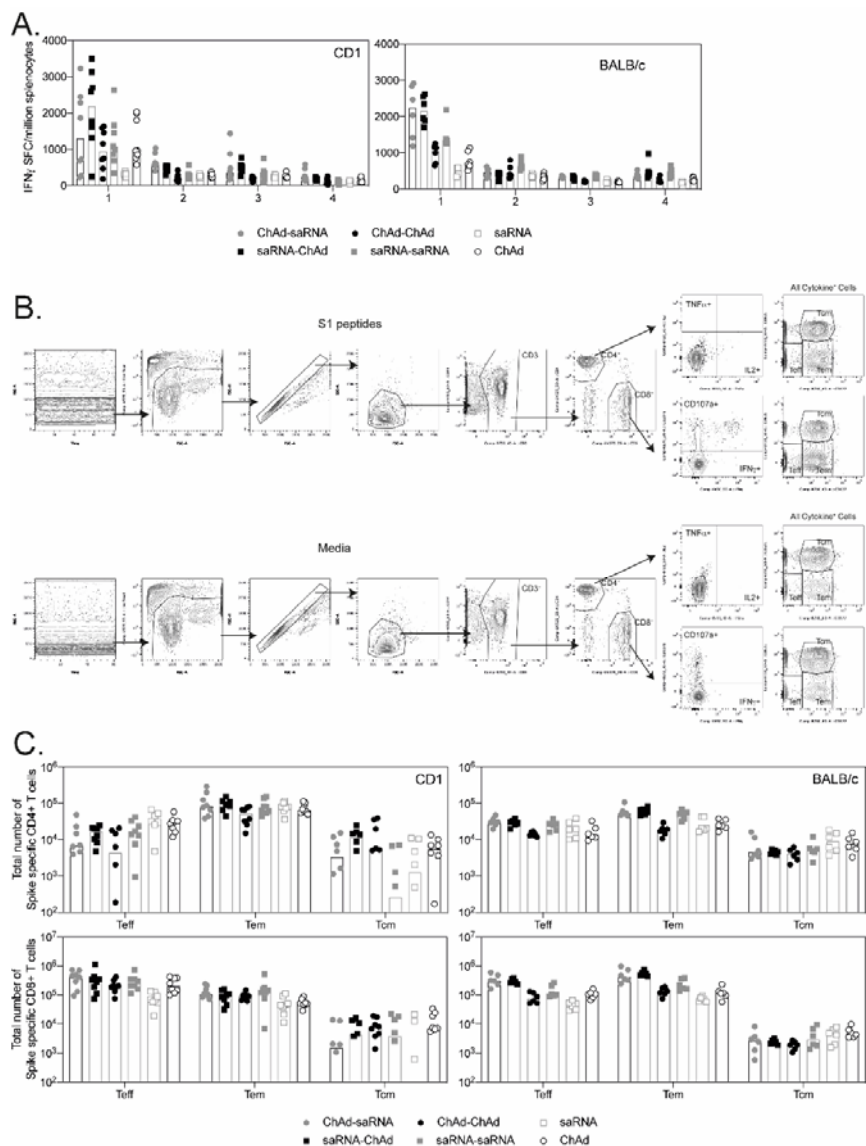

**Fig S3: T cell responses measured by ELISpot and ICS**

**A.)** Graphs show the IFN $\gamma$  SFC detected to each pool of peptides by ELISpot. Each data point represents an individual mouse, bars represent the median response per group.

**B.)** Plots show the gating strategy used to identify antigen specific T cell responses.

**C.)** Graphs show the total number of Teff, Tem and Tcm responses detected in the spleens of mice. Each point indicates an individual mouse, bars represent the median response per group.
